## Expression of Concern

# Expression of Concern: LncRNA DANCER promotes migration and invasion through suppression of LncRNA-LET in gastric cancer cells

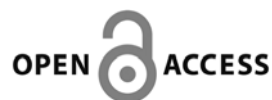

The Editorial Office has been made aware of potential issues surrounding the scientific validity of this paper, hence has issued an expression of concern to notify readers whilst the Editorial Office investigates.

Downloaded from [http://port.silverchair.com/bioscierep/article-pdf/40/7/BSR-20171070\\_EOC/889087/bsr-2017-1070-eoc.pdf](http://port.silverchair.com/bioscierep/article-pdf/40/7/BSR-20171070_EOC/889087/bsr-2017-1070-eoc.pdf) by guest on 09 April 2024

Version of Record published:  
29 July 2020
